# Supplementary material
Source: Elsevier journal article supplement (https://www.sciencedirect.com/science/article/pii/S0014256522000832)

**Figura suplementaria 1.** Tasas específicas para los ingresos CON y POR EPOC en función del grupo de edad. Período 1996-2018. Total (hombres y mujeres).

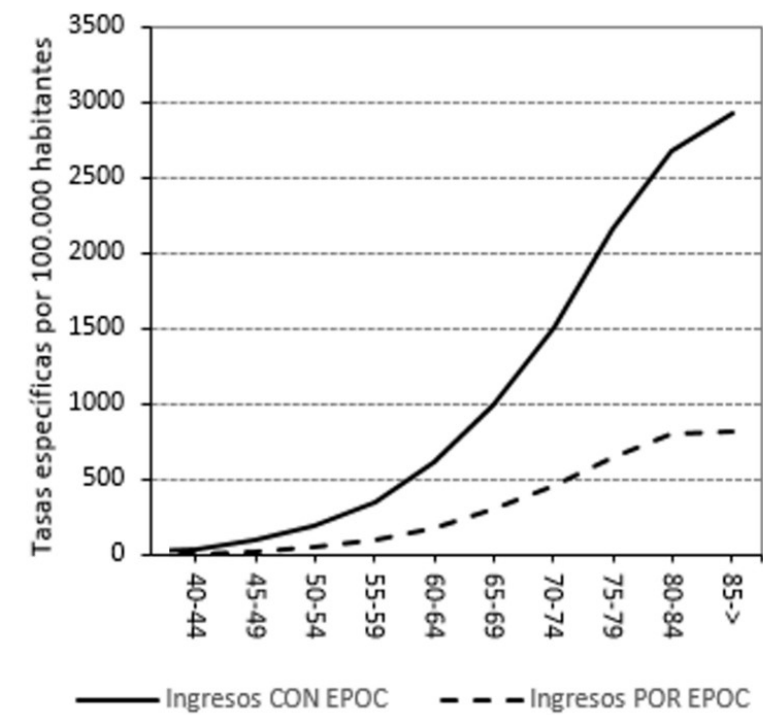

**Figura suplementaria 2.** Porcentaje de ingresos CON, POR y CON sin POR EPOC en función del mes de ingreso. Período 1996-2018.

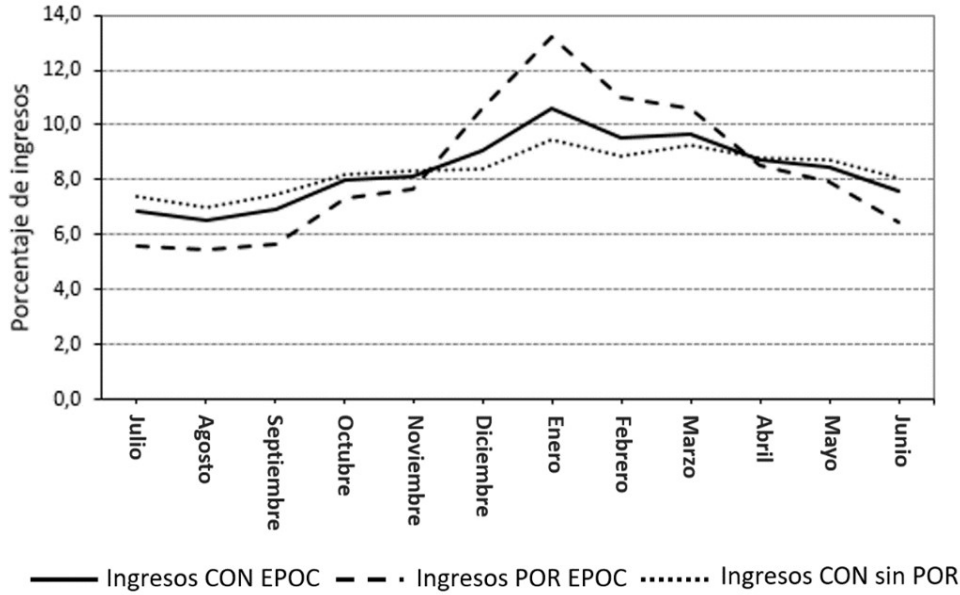

Supplement: mmc1 [file S0014256522000832:mmc1.pdf]
